# Supplementary material
Source: PubMed Central journal article supplement (PMC7871232)
Supplement: NIHMS1662529-supplement-Supporting_Information.pdf [file NIHMS1662529-supplement-Supporting_Information.pdf]

**a**  
 MAQRIFTLILLLASTSVFAGLFDAPGRSQFVPADQAFADFQONQHDLNLTWQIKDGYLYLRKQIRITPEHAKI  
 ADVQLPQGVWHEDEFYKSEIYRDRLTLPVTINQASAGATLTVTYQGCADAGFCYPPETKTVPLSEVVANNAAP  
 QPVSVPQLVPRGSTSQEQPTAQLMAFALGILSVFSPCVLPVVPLIFAGSRGRALDAFLIVAGLTISMLILGYTA  
 SLFFGFRRVAMLFLLIFALILLSDELDEKVSIFASRMTSGLSWKIQTLPSSFFGMLLAFLWLPCILPFAGIAI  
 SQTLLSENPLVMLS YGLGMAVTIAAVFKMGEKFKANFQ LIRKVTGAI VLLYLAYFALTEVLLLEHHHHHH

**b**

|            |                                                                      |     |     |     |     |     |
|------------|----------------------------------------------------------------------|-----|-----|-----|-----|-----|
|            | 1                                                                    | 11  | *   | 21  | 31  | 41  |
| AfCcdA(CC) | <u>GSTSQEQPTAQLMAFALGILSVFSPCVLPVVPLIFAGSRGRALDAFLIVAGLTISMLILG</u>  |     |     |     |     |     |
| AfCcdA(AA) | <u>GSTSQEQPTAQLMAFALGILSVFSPAVLPVVPLIFAGSRGRALDAFLIVAGLTISMLILG</u>  |     |     |     |     |     |
|            | TM1                                                                  |     |     | TM2 |     |     |
|            | H1                                                                   |     |     | H2  |     |     |
|            | 51                                                                   | 61  | 71  | 81  | 91  | 101 |
| AfCcdA(CC) | <u>YTASLFFGFRRVAMLFLLIFALILLSDELDEKVSIFASRMTSGLSWKIQTLPSSFFGML</u>   |     |     |     |     |     |
| AfCcdA(AA) | <u>YTASLFFGFRRVAMLFLLIFALILLSDELDEKVSIFASRMTSGLSWKIQTLPSSFFGML</u>   |     |     |     |     |     |
|            | TM3                                                                  |     | H3  |     | H4  |     |
|            | 111                                                                  | *   | 121 | 131 | 141 | 151 |
| AfCcdA(CC) | <u>LAFLWLPCILPFAGIAISQTLLSENPLVMLS YGLGMAVTIAAVFKMGEKFKANFQ LIRK</u> |     |     |     |     |     |
| AfCcdA(AA) | <u>LAFLWLPAILPFAGIAISQTLLSENPLVMLS YGLGMAVTIAAVFKMGEKFKANFQ LIRK</u> |     |     |     |     |     |
|            | TM4                                                                  |     | TM5 |     | H5  |     |
|            | h                                                                    | h'  |     |     |     |     |
|            | 171                                                                  | 181 | 191 |     |     |     |
| AfCcdA(CC) | <u>VTGAI VLLYLAYFALTEVLLLEHHHHHH</u>                                 |     |     |     |     |     |
| AfCcdA(AA) | <u>VTGAI VLLYLAYFALTEVLLLEHHHHHH</u>                                 |     |     |     |     |     |
|            | TM6                                                                  |     |     | H6  |     |     |

## Supplementary Figure 1

### AfCcdA sequences and topology.

**a.** Amino acid sequence of the AfCcdA expression construct. *E. coli* DsbDα (gray) is at the N-terminus, followed by a thrombin cleavage site (underlined) and a 9-residue spacer, followed by the AfCcdA sequence with a C-terminal His-tag. Non-native residues in the final NMR protein sample are *italicized*. **b.** AfCcdA oxidized (CC) and reduced state (AA) sequences marked with actual and predicted TM helices. Amino acid sequences of the NMR constructs used in this study are aligned and colored as follows: unassigned positions are indicated in red; helical regions predicted by TALOS+ are underlined; and non-native sequences are italicized and the positions of the functional cysteines are marked with (\*). For AfCcdA(AA), open boxes below the sequence indicate the TMpred predicted TM helices and colored boxes correspond to the structure presented in Figure 2.

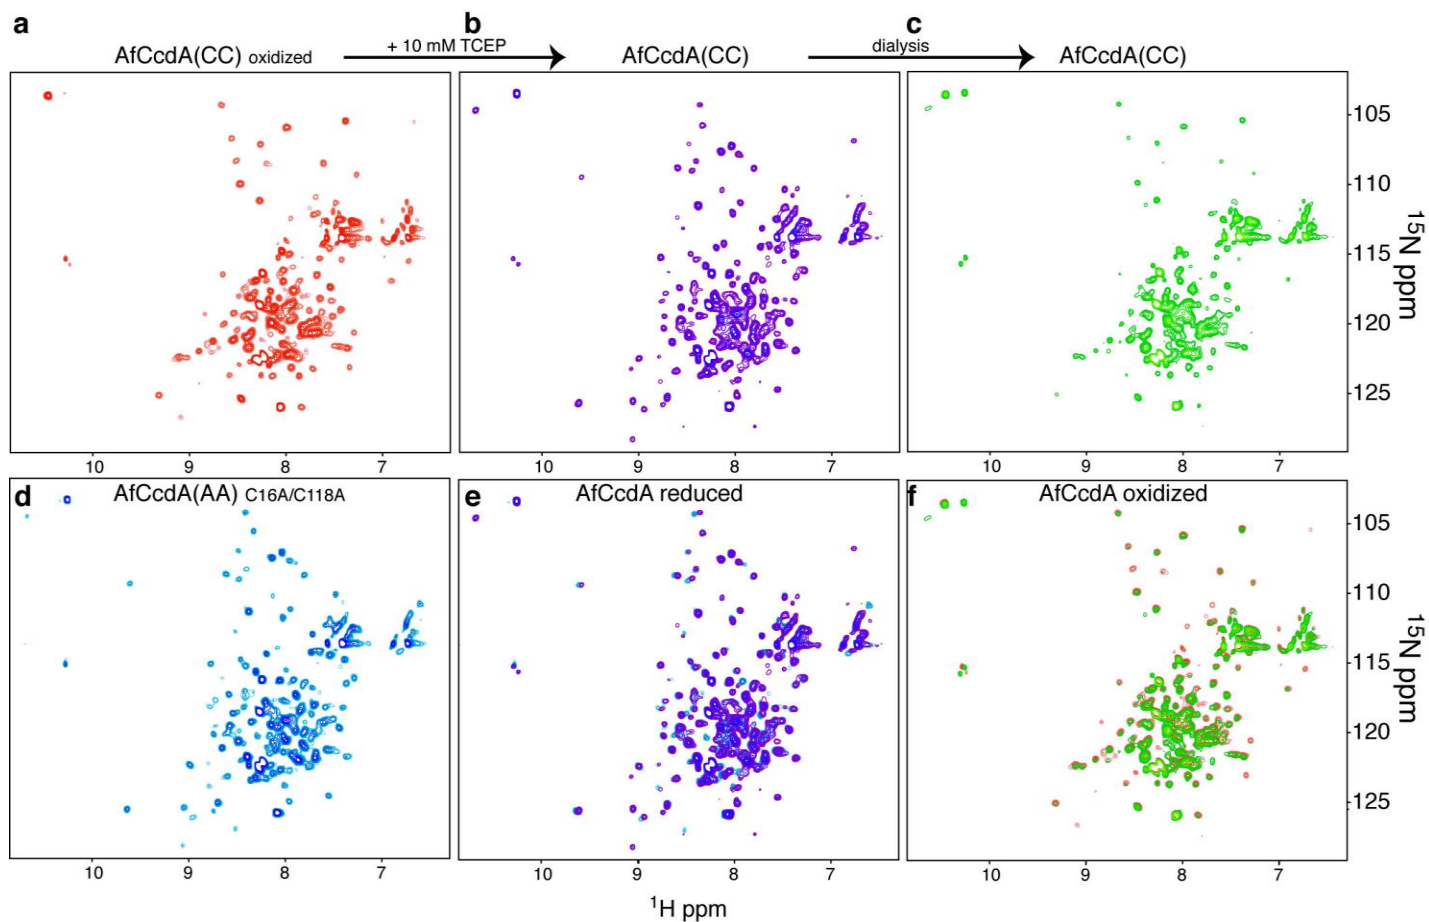

## Supplementary Figure 2

$^1\text{H}$ - $^{15}\text{N}$  TROSY-HSQC spectra of interchanging redox conformations of AfCcdA.

- a. Wild-type AfCcdA(CC), prepared so that the disulfide bond is oxidized (red).
- b. AfCcdA(CC) with 10 mM TCEP to reduce the disulfide bond (purple).
- c. AfCcdA(CC) after dialysis to remove TCEP (green).
- d. Double mutant AfCcdA C16A/C118A (AA) (blue).
- e. Overlay of AfCcdA(AA) with AfCcdA(CC) + TCEP showing the equivalent reduced states of AfCcdA.
- f. Overlay of oxidized AfCcdA(CC) and AfCcdA(CC) post-dialysis illustrating the return to the oxidized state in the NMR conditions.

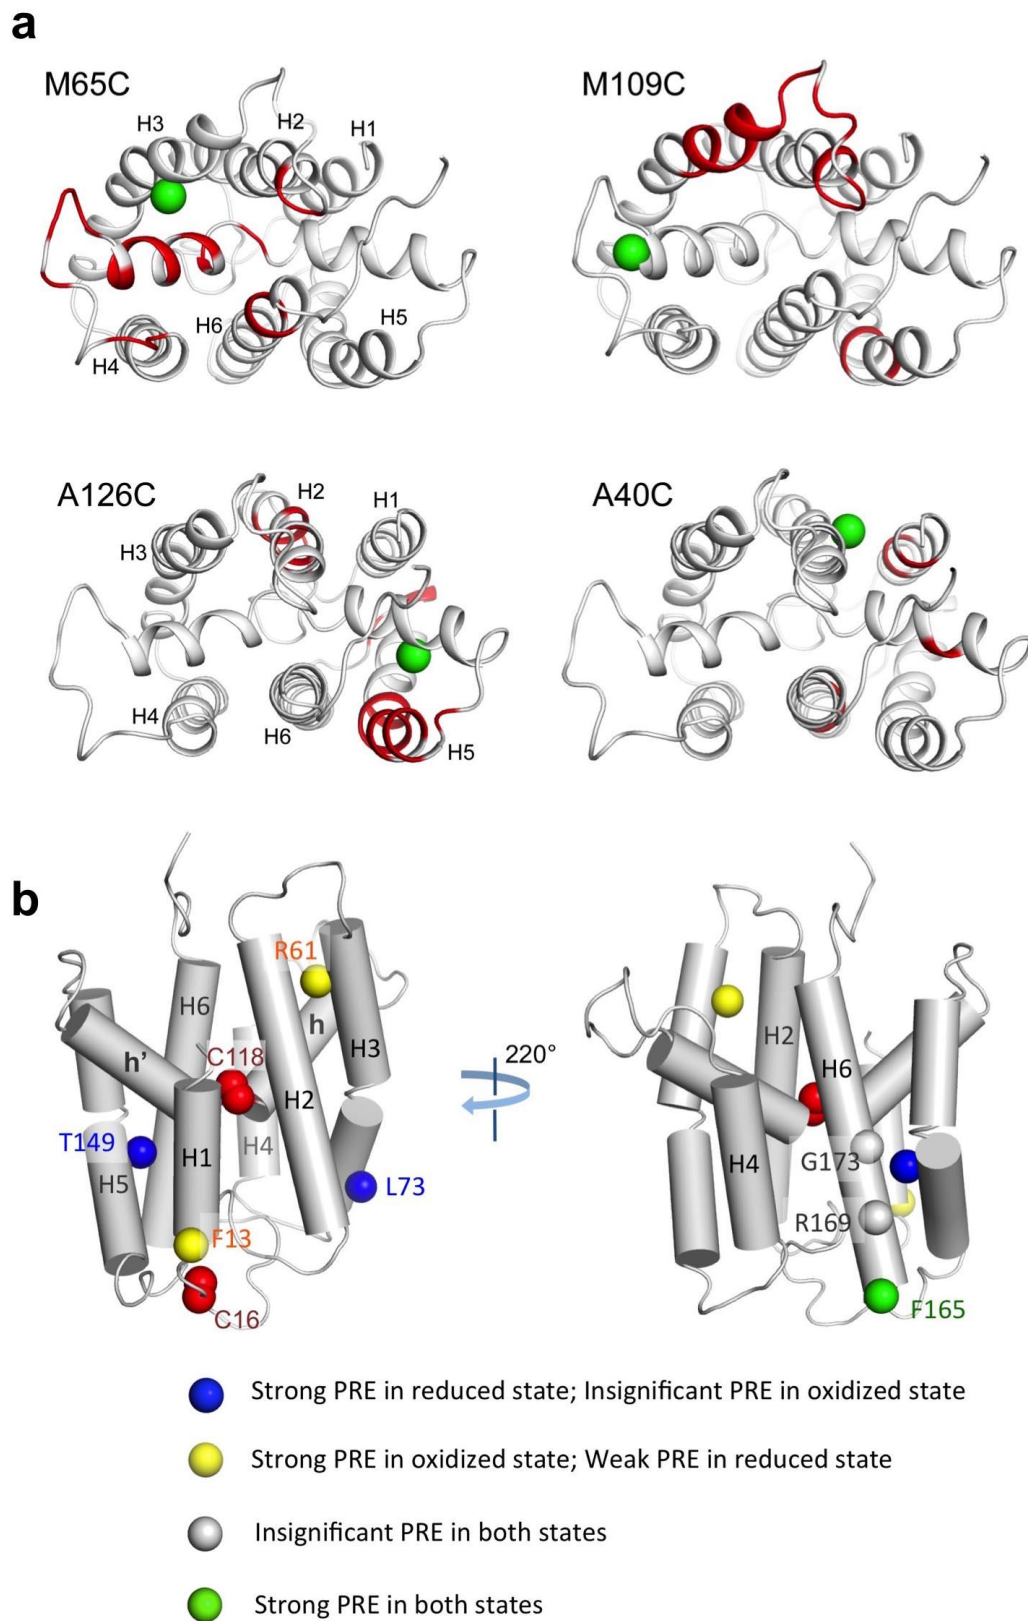

### Supplementary Figure 3

PRE analyses of CcdA.

**a. Validation of NOE-derived structure with PRE.** Ribbon representations of AfCcdA(AA), with green spheres denoting the residue positions labeled with MTSL. PRE effects were measured as the ratio of peak intensities before and after reduction of MTSL with ascorbate. Strong long-range PREs are mapped onto the structure in red (PRE ratios < 0.2). The PRE effects are only shown for residues that are not in the same helix as the MTSL label.**b. Alternating accessibility of AfCcdA oxidized and reduced states probed by Gd-DOTA titration.** The AfCcdA(AA) reduced state structure is shown in grey with the cysteine positions indicated with red spheres. A strong PRE is indicative of solvent accessibility. Positions in the structure are indicated as follows: blue spheres indicate positions with greater accessibility in the reduced state; yellow spheres indicate positions with greater accessibility in the oxidized state; grey spheres indicate positions with insignificant accessibility in both states; and green spheres indicate strong accessibility in both states. PRE values were calculated as the ratio of the amide peak intensity with Gd-DOTA to the reference intensity without the paramagnetic.

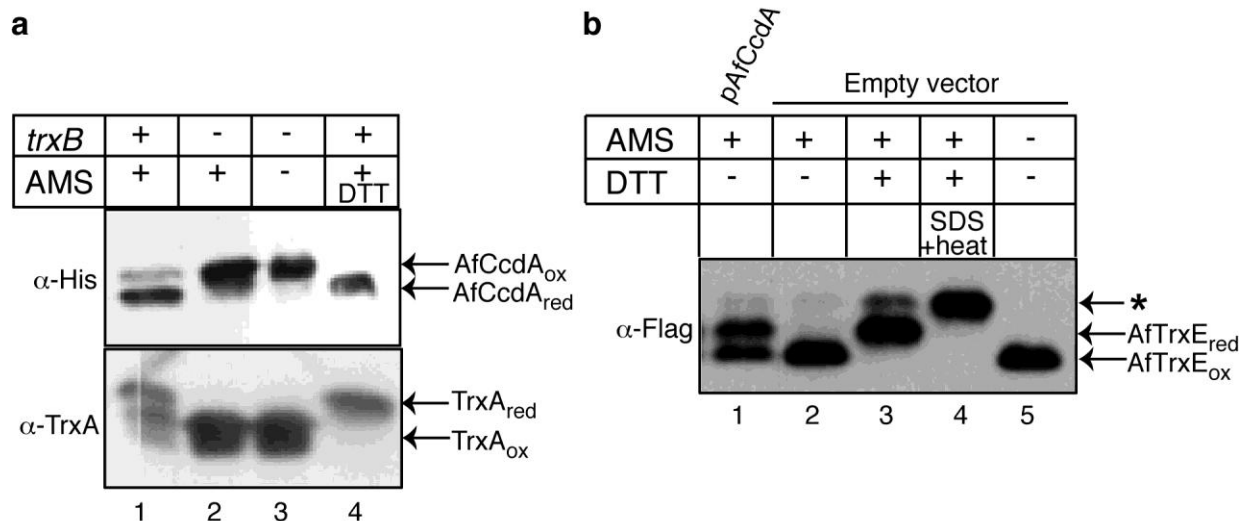

## Supplementary Figure 4

### The *in vivo* functionality of AfCcdA.

**a. TrxA can reduce AfCcdA.** AfCcdA without the DsbD $\alpha$  fusion was expressed in wild-type (lanes 1 and 4) and  $\Delta$ *trxB* (lanes 2 and 3) *E. coli* strains. AfCcdA is significantly in the reduced state in the wild-type strain (lane 1), while TrxA is in the oxidized state and keeps AfCcdA oxidized in the  $\Delta$ *trxB* strain (lane 2). AMS alkylation was used to discriminate the redox states of the proteins. No AMS (lane 3) and DTT prior to AMS (lane 4) were added to the samples as controls. Note that the gel shift to show the redox states of AfCcdA is reverse of the shift for those of D $\alpha$ -AfCcdA (Fig. 3a). Anti-His and anti-TrxA antibodies were used to detect AfCcdA-His and TrxA, respectively. **b. AfTrxE is the periplasmic substrate of AfCcdA.** AfTrxE was expressed with AfCcdA (lane 1) or alone (lanes 2-5) in the  $\Delta$ *dsbD* strain. AfTrxE reduction depends on the presence of AfCcdA (compare lane 1 with lane 2). Lanes 3 to 5 are controls. In lanes 3 and 4, AfTrxE was reduced with DTT prior treatment with AMS. Two bands are observed because in addition to the active site CXXC, AfTrxE has an additional pair of cysteines that form a structural disulfide. This structural disulfide is partly reduced in lane 3 but fully reduced in lane 4 (\* indicates reduction of the structural disulfide). The sample shown in lane 4 was prepared by reducing the protein in the presence of SDS, which denatures the protein and facilitates the reduction of the disulfide. Lane 5 shows the oxidized, non AMS-modified sample. Anti-Flag antibody was used to detect AfTrxE-3xFlag.

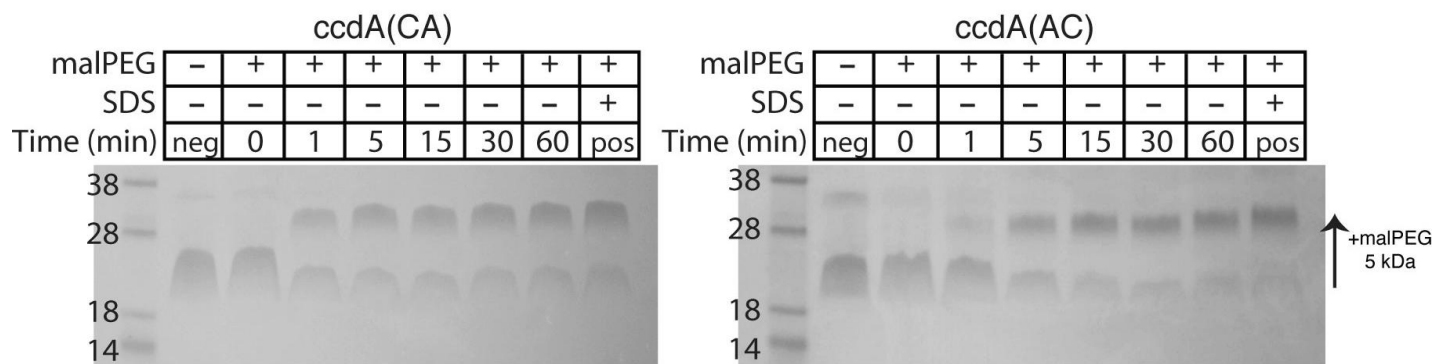

## Supplementary Figure 5

### AfCcdA single-cysteine mutants' time course of labeling by malPEG.

SDS-PAGE of AfCcdA-C118A (CA) and AfCcdA-C16A (AC) labeling by 5 kDa malPEG as a function of time (0-60 minutes) versus negative (no malPEG) and positive (SDS-denatured) controls.

**a**

| Strains or Plasmids | Relevant Genotype or Features                                                                                                                                                          | Source or reference      |
|---------------------|----------------------------------------------------------------------------------------------------------------------------------------------------------------------------------------|--------------------------|
| <b>Strains</b>      |                                                                                                                                                                                        |                          |
| XL1-Blue            | <i>endA1 gyrA96(nal<sup>R</sup>) thi-1 recA1 relA1 lac glnV44 F'[::Tn10 proAB<sup>+</sup> lacI<sup>q</sup> Δ(lacZ)M15] hsdR17(r<sub>K</sub><sup>-</sup> m<sub>K</sub><sup>+</sup>)</i> | Stratagene               |
| C43(DE3)            | <i>F- ompT hsdS<sub>B</sub> (r<sub>B</sub>- m<sub>B</sub>-) gal dcm</i> (DE3)                                                                                                          | 31                       |
| SEN212              | C43(DE3) Δ <i>trxB</i> ::Cam <sup>r</sup>                                                                                                                                              | this study <sup>32</sup> |
| SEN256              | C43(DE3) <i>dsbD</i> ::mini-Tn10 Cam <sup>r</sup>                                                                                                                                      | this study <sup>5</sup>  |
| <b>Plasmids</b>     |                                                                                                                                                                                        |                          |
| pBAD43              | Arabinose regulation, pSC101-based, Spectinomycin <sup>r</sup>                                                                                                                         | 43                       |
| pSC209              | pBAD43 with 3×Flag                                                                                                                                                                     | 15                       |
| pET28a              | IPTG-regulated T7 promoter, Kan <sup>r</sup>                                                                                                                                           | Novagen                  |
| pET22b              | IPTG-regulated T7 promoter, Amp <sup>r</sup>                                                                                                                                           | Novagen                  |
| pSC124              | pET28a with DsbDα <sup>thrombin</sup>                                                                                                                                                  | this study               |
| pSC148              | pSC124 with <i>AfCcdA</i>                                                                                                                                                              | this study               |
| pSC148AC            | pSC148 with C16A in <i>AfCcdA</i>                                                                                                                                                      | this study               |
| pSC148CA            | pSC148 with C118A in <i>AfCcdA</i>                                                                                                                                                     | this study               |
| pSC148AA            | pSC148 with C16A and C118A in <i>AfCcdA</i>                                                                                                                                            | this study               |
| pSC148AA40C         | pSC148AA with A40C in <i>AfCcdA</i>                                                                                                                                                    | this study               |
| pSC148AA65C         | pSC148AA with M65C in <i>AfCcdA</i>                                                                                                                                                    | this study               |
| pSC148AA109C        | pSC148AA with M109C in <i>AfCcdA</i>                                                                                                                                                   | this study               |
| pSC148AA126C        | pSC148AA with A126C in <i>AfCcdA</i>                                                                                                                                                   | this study               |
| pSC175              | pBAD43 with <i>Af1675-3</i> ×FLAG                                                                                                                                                      | this study               |
| pSC180              | pET22b with <i>AfCcdA</i>                                                                                                                                                              | this study               |

**b**

| Primers                 | Sequence (5' to 3')                                               | Plasmids constructed |
|-------------------------|-------------------------------------------------------------------|----------------------|
| <i>AfCcdA</i> (NdeI)_F  | AAAAAACATATGATGCTGATGGCATTTCGCC                                   | pSC180               |
| <i>AfCcdA</i> (XhoI)_R  | AAAAAACTCGAGCAGCAGGACCTCGGTCAG                                    | pSC180               |
| <i>DsbDα</i> (NcoI)_F   | gagCCATGGCTCAACGCATCTTTAC                                         | pSC124               |
| <i>DsbDα</i> (BamHI)_R  | gagGGATCCACGCGGAACCAGCTGCGGAACAGACA<br>CAGGCTG                    | pSC124               |
| <i>AfCcdA</i> (BamHI)_F | gagGGATCCACTAGTCAAGAGCAGCCCACCGCGCA<br>ACTGATGGCATTTCGCCCTGGGTATC | pSC148               |
| <i>Af1675</i> (NheI)_F  | gagGCTAGCAGGAGGAATTCACCATGAAGGCAATC<br>TACGCTCTAC                 | pSC175               |
| <i>Af1675</i> (XbaI)_R  | gagTCTAGATTTCTCAAGCAGCATCATAAGCTC                                 | pSC175               |
| AF9ccda-C1F             | TCCTGAGTGTGTTTAGTCCTGCAAGTGCTGCCGGTA<br>GTGCCGCT                  | pSC148AC<br>pSC148AA |
| AF9ccda-C1R             | AGCGGCACTACCGGCAGCACTGCGAGGACTAAACA<br>CACTCAGGA                  | pSC148AC<br>pSC148AA |
| AF9ccda-C2F             | TGGCGTTTCTGTGGCTGCCGCAATCCTGCCGTTT<br>GCGGGCAT                    | pSC148CA<br>pSC148AA |

|             |                                                            |                      |
|-------------|------------------------------------------------------------|----------------------|
| AF9ccda-C2R | ATGCCCGCAAACGGCAGGAT <u>TGCC</u> GGCAGCCACA<br>GAAACGCCA   | pSC148CA<br>pSC148AA |
| alphaA50CF  | TGGACGCCTTTCTGATCGTCT <u>TGCG</u> GGGCTGACAATT<br>AGTATGCT | pSC148AA40C          |
| alphaA50CR  | AGCATACTAATTGTCAGCCCCGACGATCAGAA<br>AGGCGTCCA              | pSC148AA40C          |
| preM75CF    | GTTTCTTCCGCGTGGTGGCT <u>TGC</u> CTGTTCCCTGCTGA<br>TCTTCG   | pSC148AA65C          |
| preM75CR    | CGAAGATCAGCAGGAACAGGCAAGCCACCACGCG<br>GAAGAAAC             | pSC148AA65C          |
| M119CF      | TGCCATCTTTCTTCTTTGGTTGTCTGCTGGCGTTTC<br>TGTGGCT            | pSC148AA109C         |
| M119CR      | AGCCACAGAAACGCCAGCAGACAACCAAAGAAGA<br>AAGATGGCA            | pSC148AA109C         |
| preA136CF   | TCCTGCCGTTTGCGGGCATT <u>TGT</u> ATCAGCCAGACT<br>CTGCTGAG   | pSC148AA126C         |
| preA136CR   | CTCAGCAGAGTCTGGCTGATACAAATGCCCGCAA<br>CGGCAGGA             | pSC148AA126C         |

## Supplementary Table 1

### Strains and plasmids (a) and primers (b) used in this study

43. Guzman, L. M., Belin, D., Carson, M. J. & Beckwith, J. Tight regulation, modulation, and high-level expression by vectors containing the arabinose PBAD promoter. *J. Bacteriol.* 177, 4121–4130 (1995).
